# Supplementary material for: Transcriptome response to alkane biofuels in Saccharomyces cerevisiae: identification of efflux pumps involved in alkane tolerance
Source: PubMed Central journal article supplement (PMC3717029; doi:10.1186/1754-6834-6-95), 2013-07-05

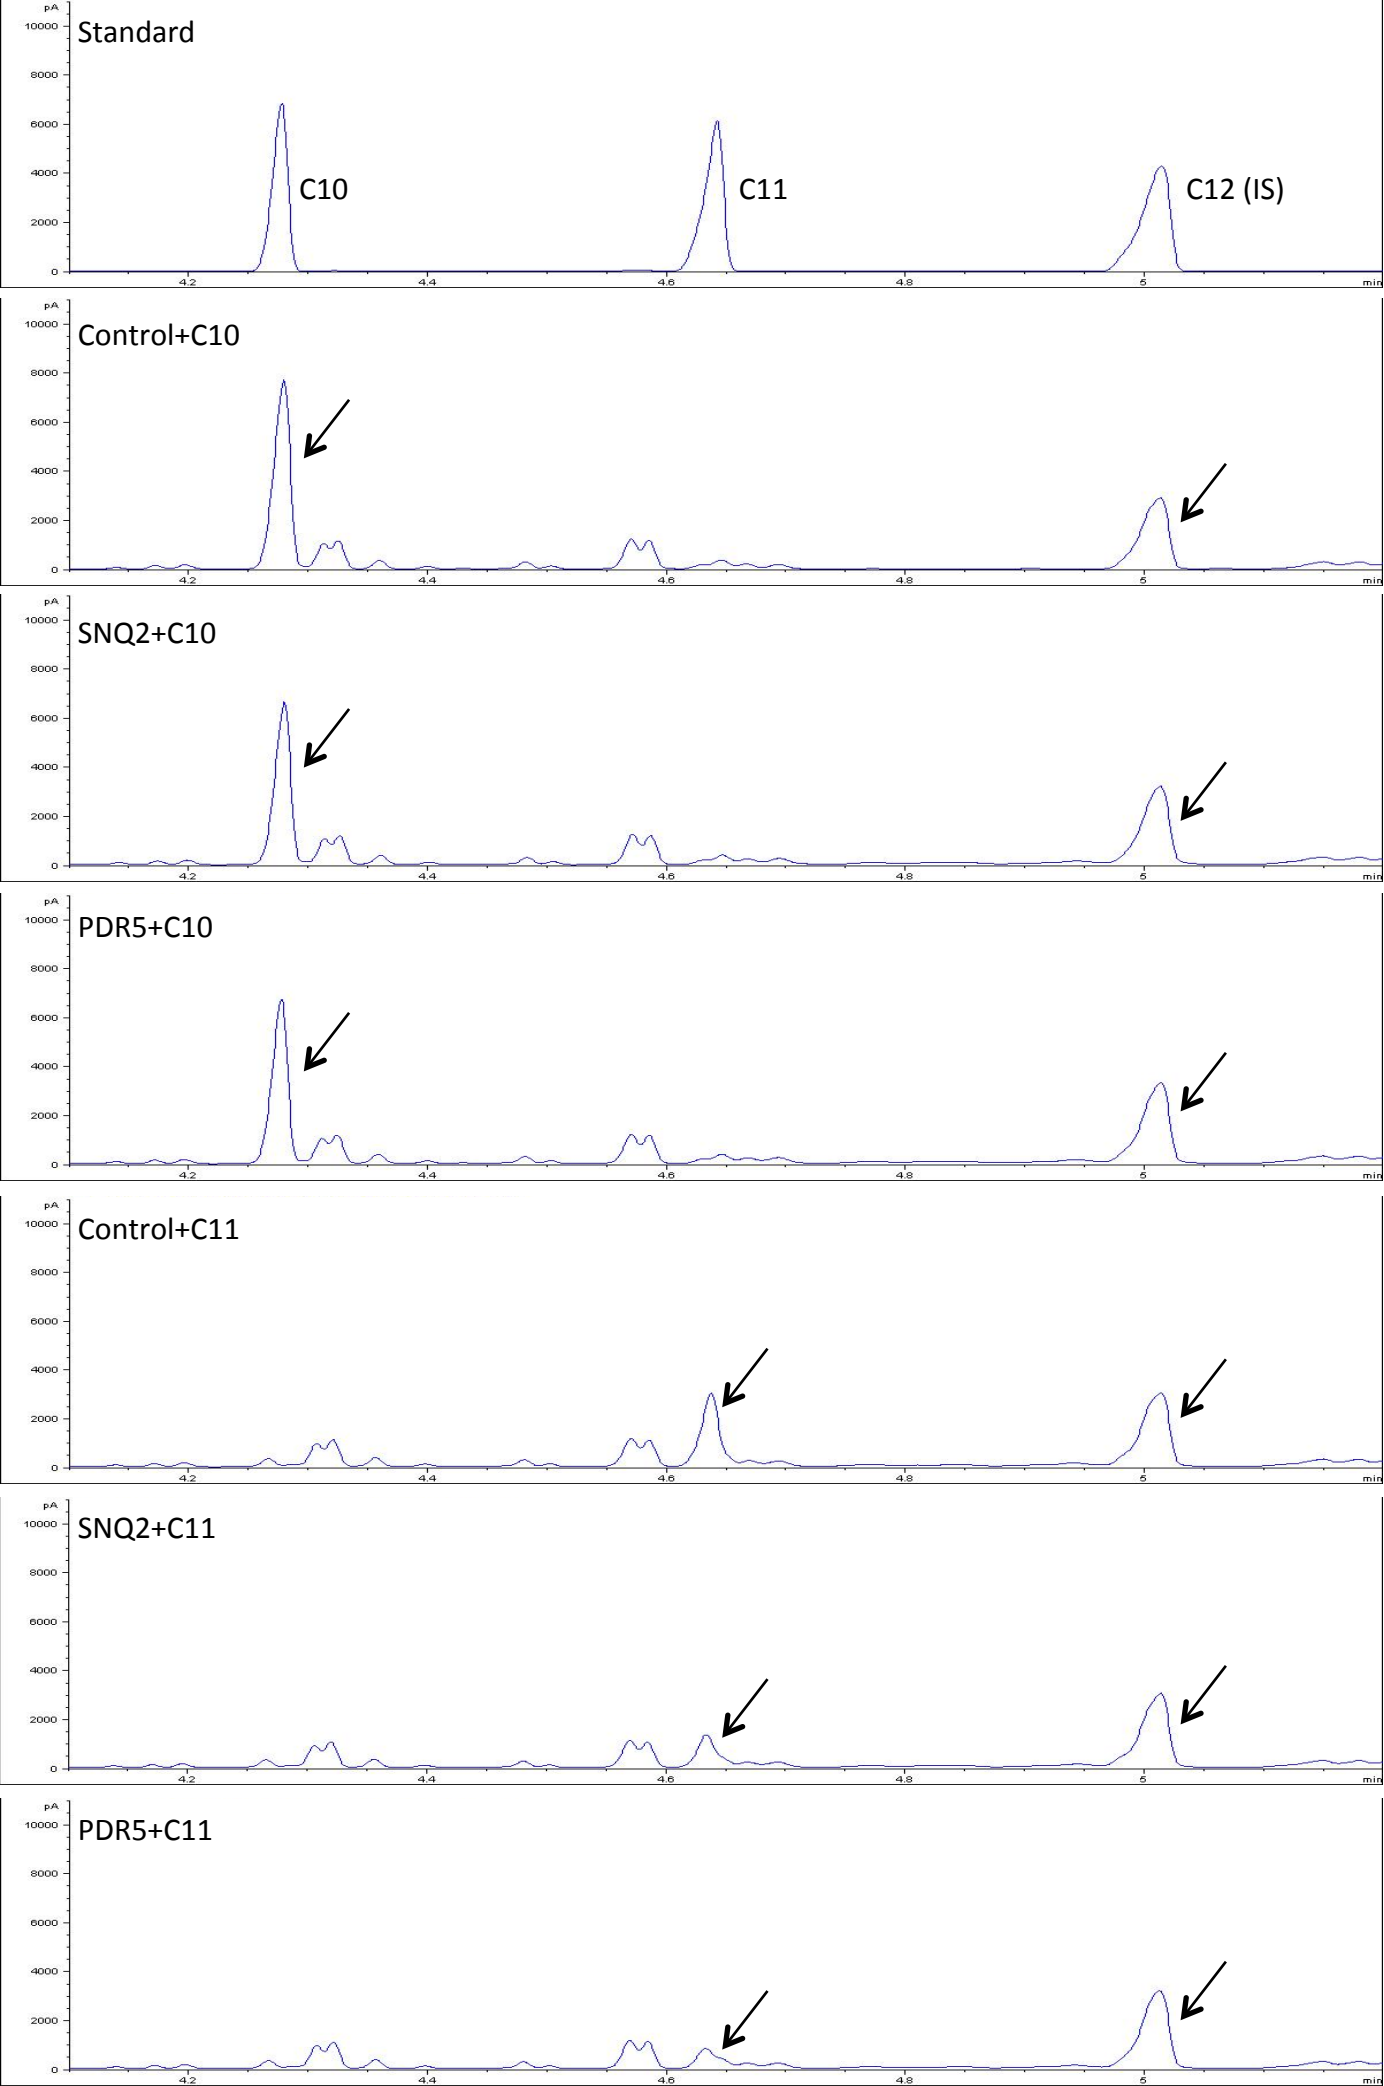

Supplement: 1754-6834-6-95-S4.pdf [file 1754-6834-6-95-S4.pdf]
